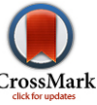

## Correction

# Correction: The Elemental Composition of Demospongiae from the Red Sea, Gulf of Aqaba

The *PLOS ONE* Staff

## Notice of Republication

This article was republished on May 20th, 2014, due to Figure 16, Figure 17, and Figure 18 being ordered incorrectly. Please download this article again to view the correct version. The originally published, uncorrected article and the republished, corrected article are provided here for reference.

## Supporting Information

**File S1. Originally published, uncorrected article.**  
(PDF)

**File S2. Republished, corrected article.**  
(PDF)

## Reference

1. Mayzel B, Aizenberg J, Ilan M (2014) The Elemental Composition of Demospongiae from the Red Sea, Gulf of Aqaba. *PLoS ONE* 9(4): e95775. doi:10.1371/journal.pone.0095775

---

**Citation:** The *PLOS ONE* Staff (2014) Correction: The Elemental Composition of Demospongiae from the Red Sea, Gulf of Aqaba. *PLoS ONE* 9(6): e99918. doi:10.1371/journal.pone.0099918

**Published:** June 4, 2014

**Copyright:** © 2014 The *PLOS ONE* Staff. This is an open-access article distributed under the terms of the Creative Commons Attribution License, which permits unrestricted use, distribution, and reproduction in any medium, provided the original author and source are credited.
